# Supplementary material
Source: publisher figshare collection journal article supplement (https://acs.figshare.com/ndownloader/files/31081843)
Supplement: Supplementary file 1 [file 31081843]

## Supporting Information

### Hollow C@MoS<sub>2</sub> Nanospheres for Microwave Absorption

Linling Xu<sup>1,2</sup>, Jiaqi Tao<sup>1,2</sup>, Xianfei Zhang<sup>1</sup>, Zhengjun Yao<sup>1,2</sup>, Bo Wei<sup>1,2</sup>, Feng Yang<sup>1</sup>, Congyu Zhou<sup>1</sup>, Ali Zavabeti<sup>3</sup>, Karma Zuraiqi<sup>4</sup>, Jintang Zhou<sup>1,2,\*</sup>

<sup>1</sup> *College of Materials Science and Technology, Nanjing University of Aeronautics and Astronautics, Nanjing, 211100, China*

<sup>2</sup> *Key Laboratory of Material Preparation and Protection for Harsh Environment (Nanjing University of Aeronautics and Astronautics), Ministry of Industry and Information Technology, Nanjing, 211100, China*

<sup>3</sup> *Department of Chemical Engineering, The University of Melbourne, Parkville, Victoria 3010, Australia*

<sup>4</sup> *School of Engineering, RMIT University, Melbourne 3000, Victoria, Australia*

**\*Corresponding authors.**

*E-mails addresses: imzjt@126.com (J, Zhou).*

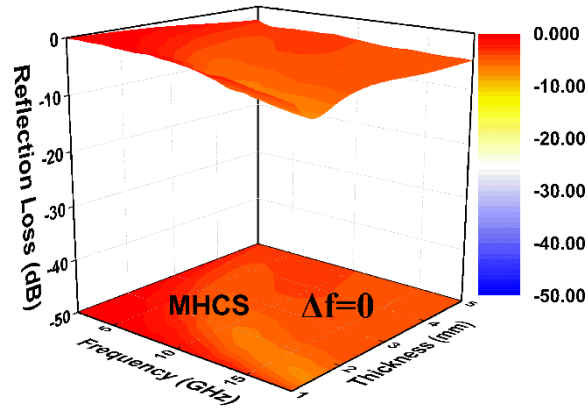

Fig. S1. EMA performance of pure MHCS.

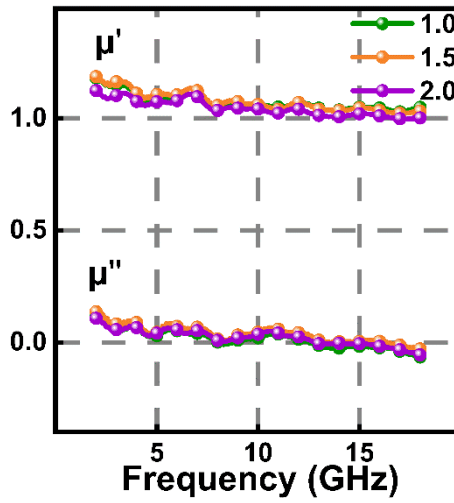

Fig. S2. Real and imaginary part of permeability of MHCS-MoS<sub>2</sub>-1.0,1.5 and 2.0.

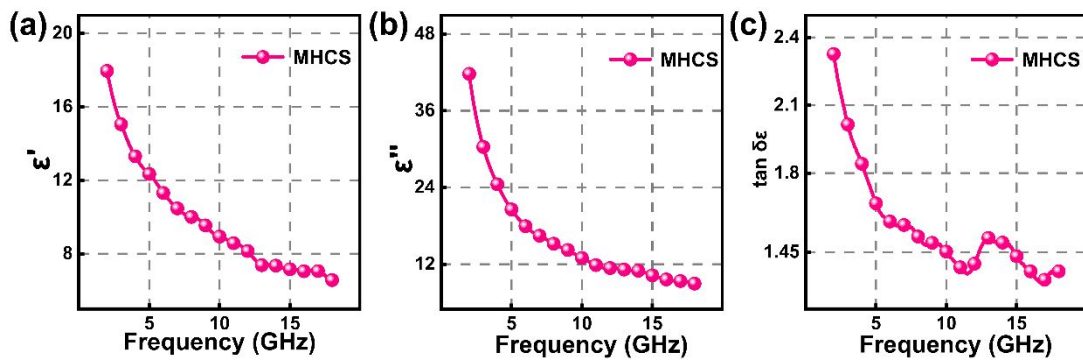

Fig. S3. (a) Real part permittivity of pure MHCS; (b) Imaginary part of pure MHCS; (c) Dielectric tangent loss of pure MHCS.

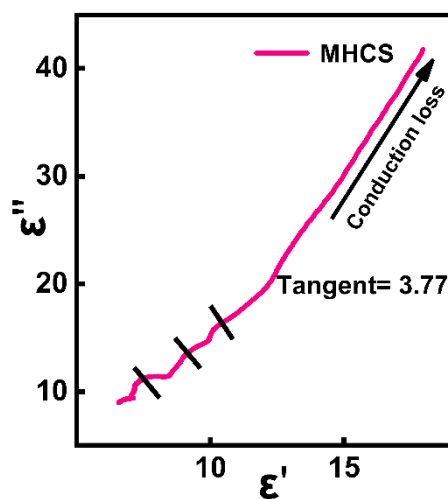

Fig. S4. Cole-Cole polarization curve of pure MHCS.

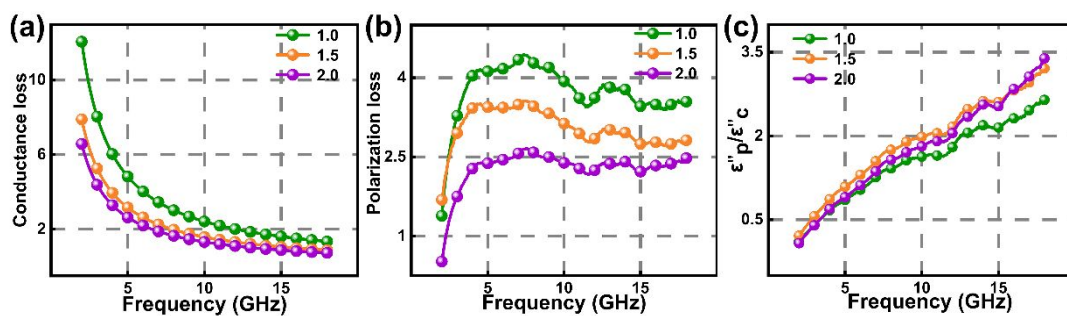

Fig. S5. (a) Conductive loss of MHCS-MoS<sub>2</sub>-1.0,1.5 and 2.0; (b) Polarization loss of MHCS-MoS<sub>2</sub>-1.0,1.5 and 2.0; (c) Ratio of polarization loss to dielectric loss of MHCS-MoS<sub>2</sub>-1.0,1.5 and 2.0.

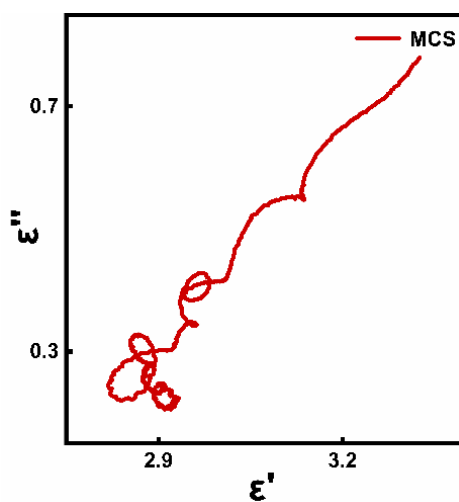

Fig. S6. Cole-Cole polarization curve of MCS.

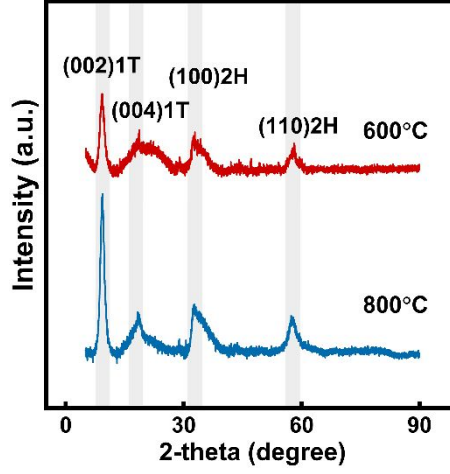

**Fig. S7.** XRD patterns of MHCS@MoS<sub>2</sub> composites treated at 600°C and 800°C.

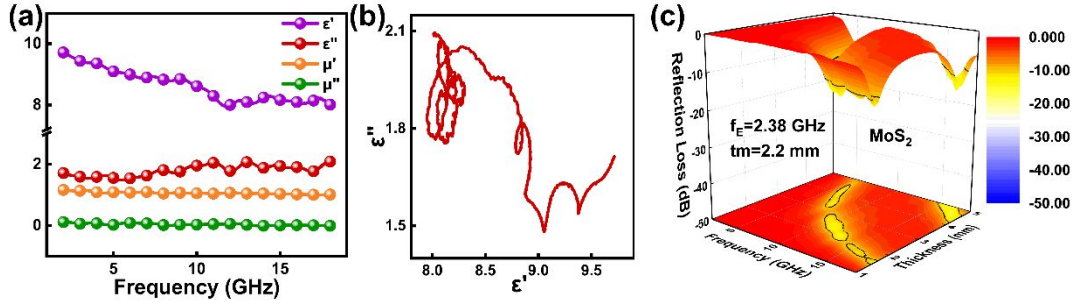

**Fig. S8.** (a) Permittivity and permeability of pure MoS<sub>2</sub>; (b) Cole-Cole polarization curve of MoS<sub>2</sub>; (c) EMA performance of pure MoS<sub>2</sub>.
